# Supplementary material for: Antifungal Activity against Botryosphaeriaceae Fungi of the Hydro-Methanolic Extract of Silybum marianum Capitula Conjugated with Stevioside
Source: MDPI journal article supplement (doi:10.3390/plants10071363), 2021-07-03
Supplement: s1 [file s1]

# Antifungal Activity against *Botryosphaeriaceae* Fungi of the Hydro-Methanolic Extract of *Silybum marianum* Capitula Conjugated with Stevioside

Natalia Langa-Lomba, Laura Buzón-Durán, Eva Sánchez-Hernández, Pablo Martín-Ramos, José Casanova-Gascón, Jesús Martín-Gil, Vicente González-García

## SUPPORTING INFORMATION

**Table S1.** Repetitions for each of the plant/treatment/pathogen combinations in the greenhouse bioassay. Each grafted plant was artificially inoculated at two sites below grafting point.

| Plant                                             | Treatment                      | Pathogen                | Number of replicates |
|---------------------------------------------------|--------------------------------|-------------------------|----------------------|
| 'Tempranillo' (CL. 32 clone)<br>on 775P rootstock | Stevioside– <i>S. marianum</i> | <i>N. parvum</i>        | 5                    |
|                                                   |                                | <i>D. viticola</i>      | 5                    |
|                                                   |                                | <i>D. seriata</i>       | 5                    |
|                                                   |                                | None (negative control) | 3                    |
|                                                   | None (positive control)        | <i>N. parvum</i>        | 4                    |
|                                                   |                                | <i>D. viticola</i>      | 4                    |
|                                                   |                                | <i>D. seriata</i>       | 4                    |
| 'Gamacha' (VCR3 clone)<br>on 110R rootstock       | Stevioside– <i>S. marianum</i> | <i>N. parvum</i>        | 5                    |
|                                                   |                                | <i>D. viticola</i>      | 5                    |
|                                                   |                                | <i>D. seriata</i>       | 5                    |
|                                                   |                                | None (negative control) | 3                    |
|                                                   | None (positive control)        | <i>N. parvum</i>        | 4                    |
|                                                   |                                | <i>D. viticola</i>      | 4                    |
|                                                   |                                | <i>D. seriata</i>       | 4                    |

**Table S2.** Kruskal–Wallis test and multiple pairwise comparisons using the Conover–Iman procedure for the lengths of the vascular necroses in greenhouse *in vivo* assays considering two independent variables (treatment and taxa).

| Sample                                             | Frequency | Sum of ranks | Mean of ranks | Groups |
|----------------------------------------------------|-----------|--------------|---------------|--------|
| Stevioside– <i>S. marianum</i> negative control    | 48        | 3160.000     | 65.833        | A      |
| <i>D. viticola</i>  Stevioside– <i>S. marianum</i> | 64        | 6628.000     | 103.563       | A B    |
| <i>D. seriata</i>  Stevioside– <i>S. marianum</i>  | 72        | 9602.000     | 133.361       | B      |
| <i>N. parvum</i>  Stevioside– <i>S. marianum</i>   | 64        | 15532.000    | 242.688       | C      |
| <i>D. seriata</i>  Positive control                | 56        | 16569.500    | 295.884       | D      |
| <i>D. viticola</i>  Positive control               | 64        | 20520.000    | 320.625       | D      |
| <i>N. parvum</i>  Positive control                 | 64        | 21516.500    | 336.195       | D      |

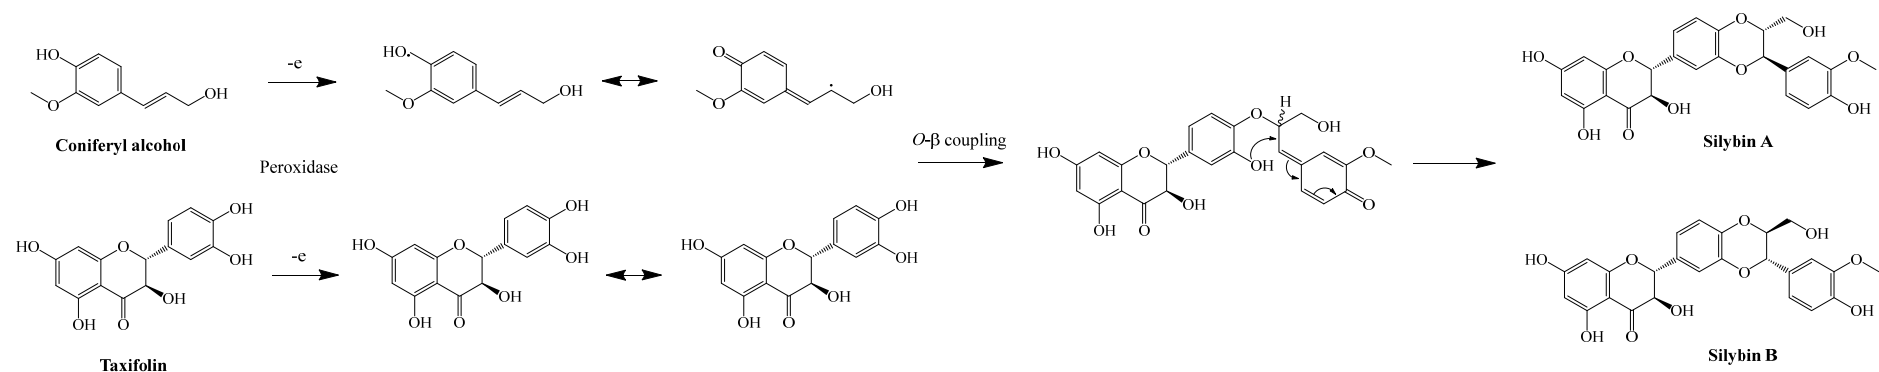

**Figure S1.** Biosynthesis pathway of silybins from taxifolin and coniferyl alcohol.

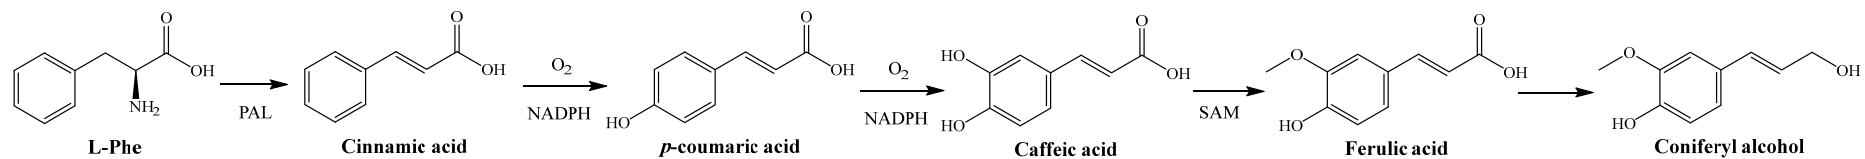

**Figure S2.** Formation of coniferyl alcohol.

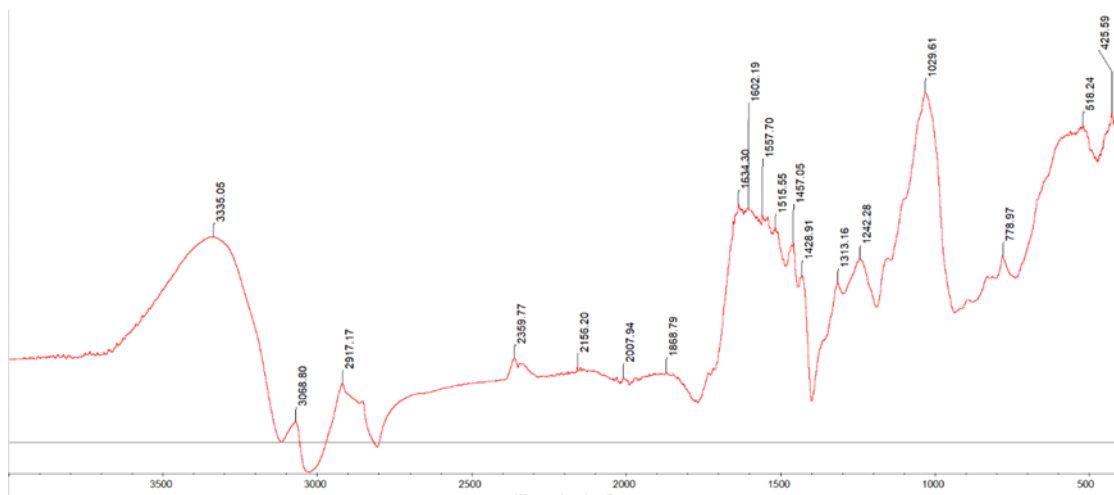

**Figure S3.** Infrared spectrum of *S. marianum* extract (after lyophilization).

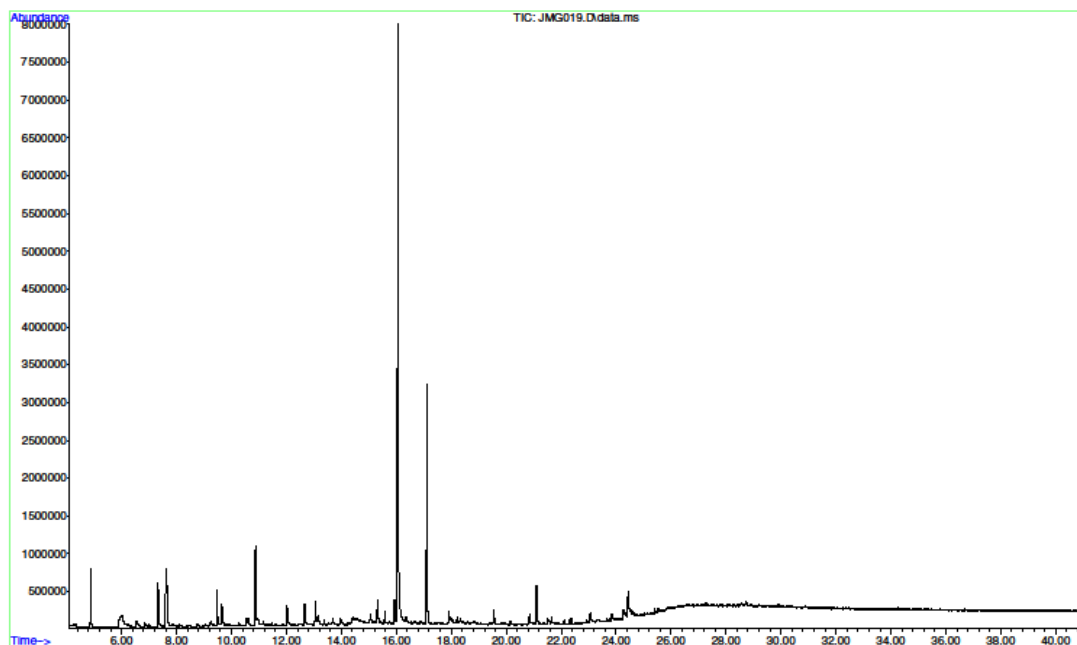

**Figure S4.** GC-MS spectrum of *S. marianum* hydromethanolic extract.

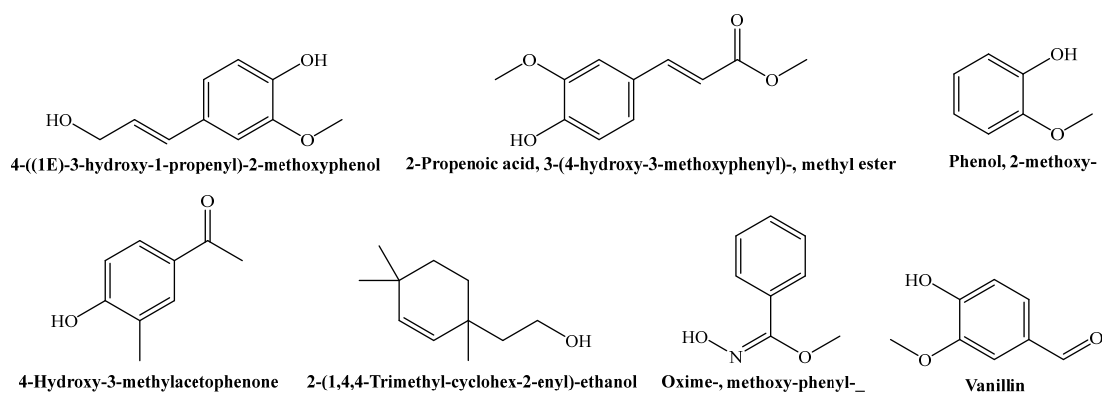

**Figure S5.** Chemical structures of some of the phytochemicals identified by GC-MS in the hydromethanolic extract of *S. marianum*.
